# Supplementary material for: Perilunate dislocation
Source: PubMed Central journal article supplement — CMAJ. 2024 Nov 18;196(39):E1310. doi: 10.1503/cmaj.241034 (PMC11573392; doi:10.1503/cmaj.241034), 2024-11-18
Supplement: 241034-image-at-1.pdf [file 241034-image-at-1.pdf]

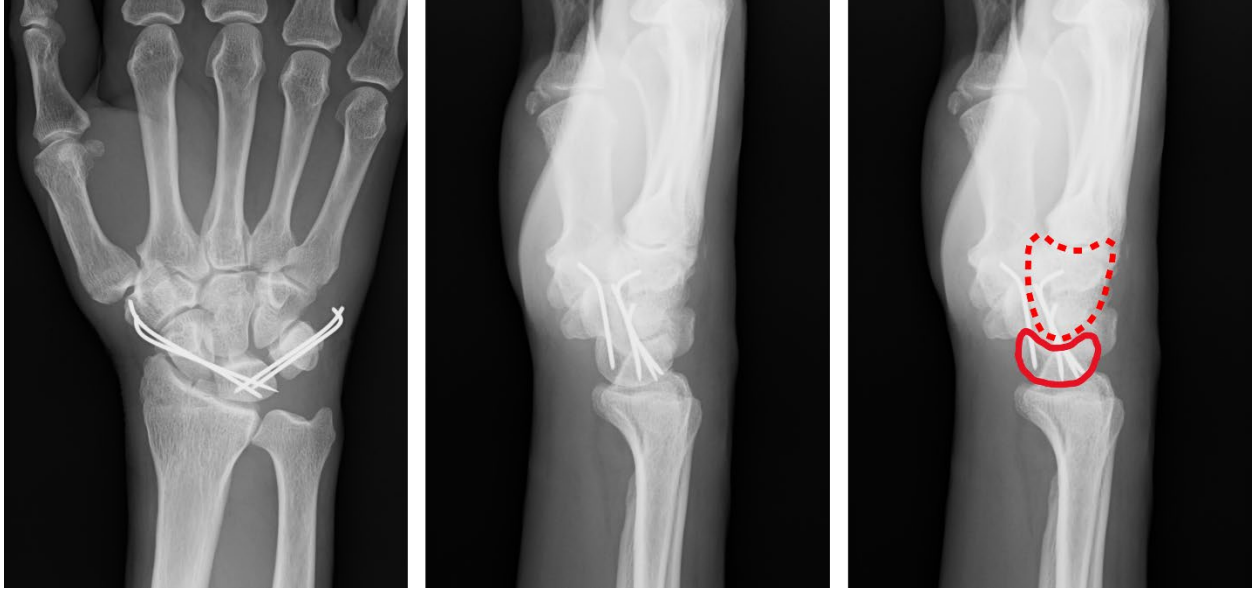

Anteroposterior and lateral postoperative radiographs showing the capitate (dashed line) and the lunate (solid line) aligned in a straight line.
